# Supplementary material
Source: PubMed Central journal article supplement (PMC6119100)
Supplement: NIHMS971455-supplement-216_2018_1145_MOESM1_ESM.pdf [file NIHMS971455-supplement-216_2018_1145_MOESM1_ESM.pdf]

**Analytical and Bioanalytical Chemistry**

**Electronic Supplementary Material**

**Analysis of lipid adsorption on nanoparticles by nanoflow  
liquid chromatography-tandem mass spectrometry**

Ju Yong Lee, Hua Wang, Georgios Pyrgiotakis, Glen M. DeLoid, Zhenyuan Zhang,  
Juan Beltran-Huarac, Philip Demokritou, Wenwan Zhong

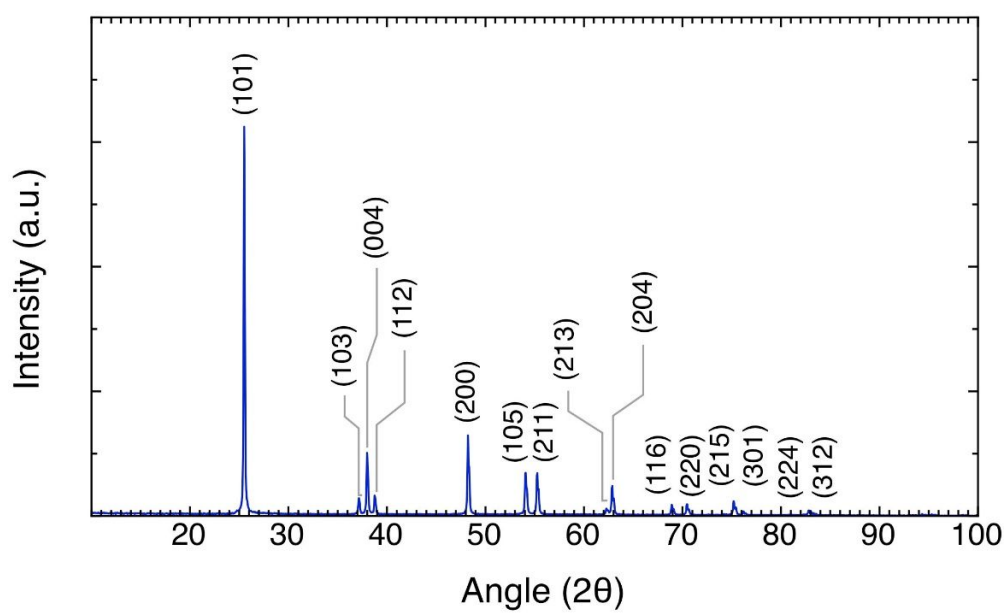

**Fig. S1** XRD Pattern for the TiO<sub>2</sub> E171

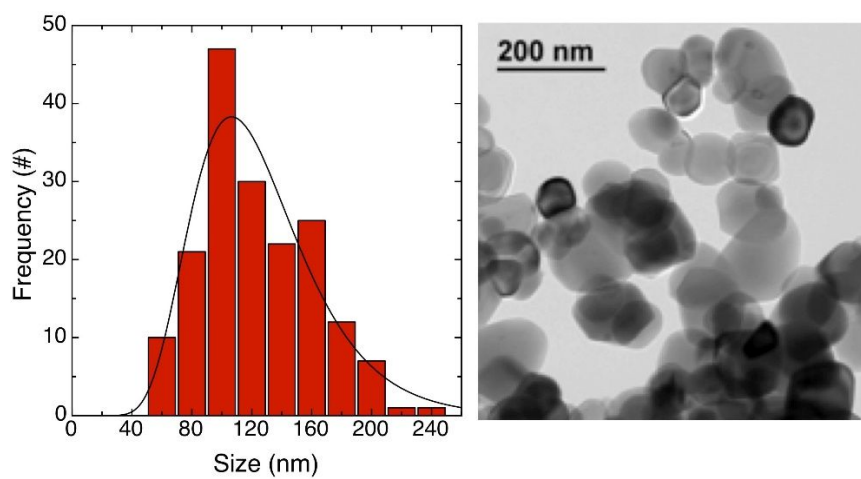

**Fig. S2** TEM Feret size distribution for the TiO<sub>2</sub> E171

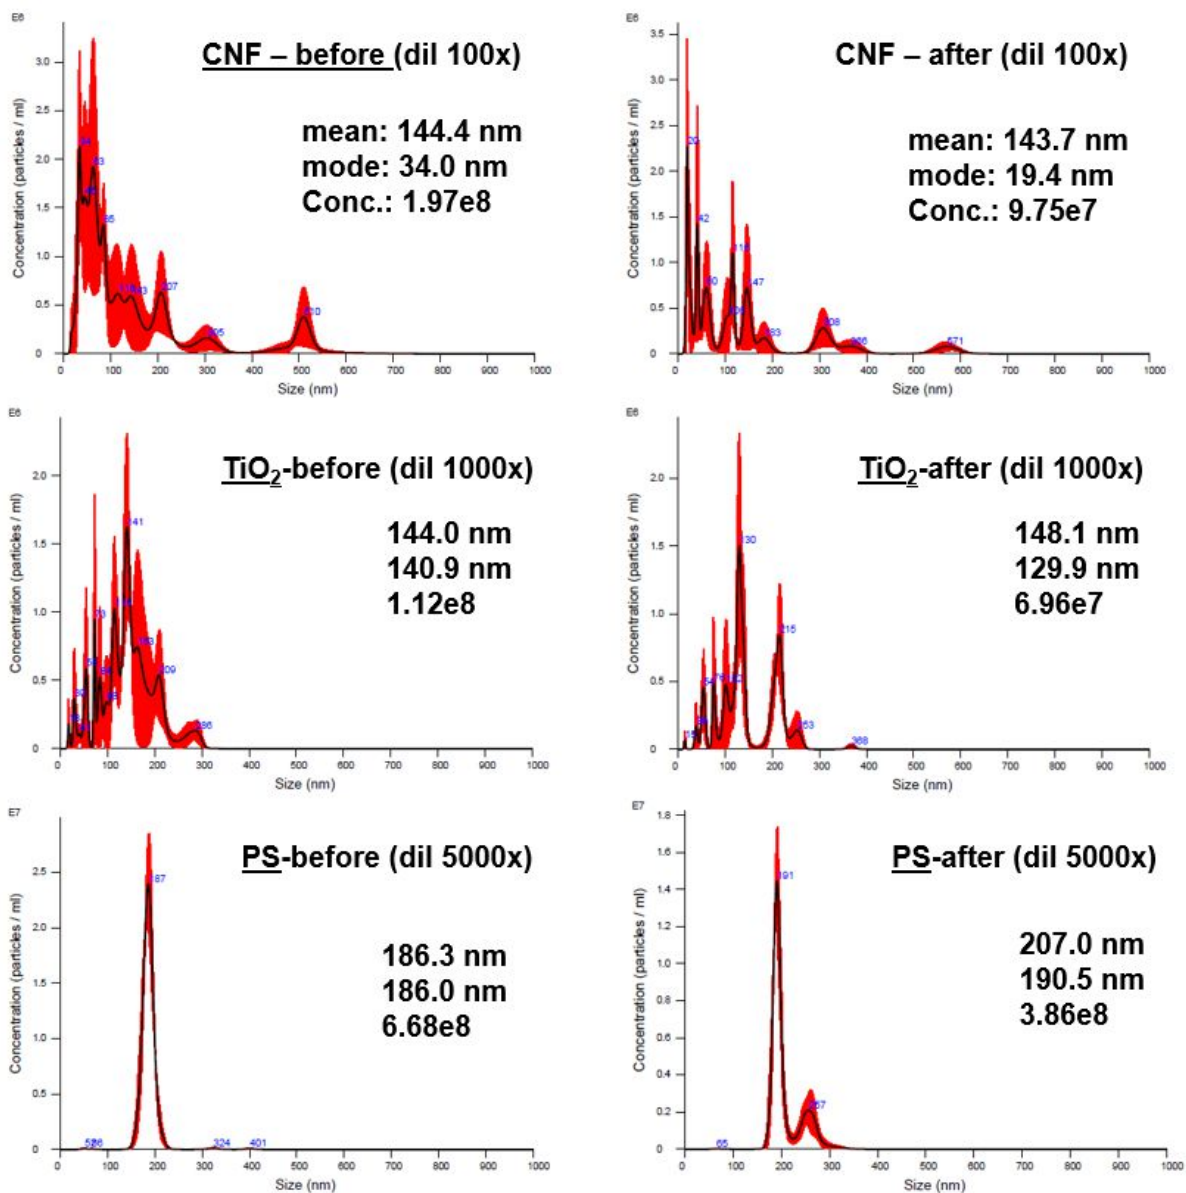

**Fig. S3** Profiling of size distribution of CNF, TiO<sub>2</sub> and PS before/after lipid extraction method. Size of all samples were measured three times by nanoparticle tracking analysis (NTA). The NTA is a model NS300 produced from Nanosight Ltd. (Salisbury, UK)

**Table S1** Morphological and structural properties of ENMs

| ENM  | Primary Particle Size   |                       |                       |                       | Crystal Structure |                   |
|------|-------------------------|-----------------------|-----------------------|-----------------------|-------------------|-------------------|
|      | SSA (m <sup>2</sup> /g) | d <sub>BET</sub> (nm) | d <sub>TEM</sub> (nm) | d <sub>XRD</sub> (nm) | Crystal System    | Crystallinity (%) |
| E171 | 14.44 ± 0.72            | 103.2 ± 5.2           | 113.4 ± 37.2          | 55.6 nm               | Anatase           | 88.5%             |

ENM, engineered nanomaterial; SSA by nitrogen adsorption/Brunauer-Emmett-Teller (BET) method; d<sub>BET</sub>, d<sub>TEM</sub> and d<sub>XRD</sub>, particle

**Table S2** Physical properties of ENMs

| ENM  | Shape Factors |               |               | Porosity                 |                       | ρ <sub>raw</sub> (g/cc) |
|------|---------------|---------------|---------------|--------------------------|-----------------------|-------------------------|
|      | Aspect ratio  | Circularity   | Roundness     | TPV (cc/g)               | APS <sup>§</sup> (nm) |                         |
| E171 | 1.203 ± 0.134 | 0.942 ± 0.028 | 0.841 ± 0.087 | 0.191 × 10 <sup>-2</sup> | 2.65                  | 4.032±0.002             |

ENM, engineered nanomaterial; TPV and APS, total pore volume and average pore size, respectively determined by nitrogen adsorption/Brunauer-Emmett-Teller (BET) method; ρ<sub>raw</sub>, the raw density of ENMs determined by nitrogen volume displacement (pycnometry); <sup>§</sup>TEM did not confirm the presence of pores but interparticle spacing instead.

**Table S3** Chemical and biological properties of ENMs

| ENM                  | Chemical Elemental Composition |                           |                      |                         | Recombinant<br>Factor C<br>(EU/mg) <sup>ε</sup> | Sterility<br>(bacterial<br>growth<br>observed) <sup>†</sup> |
|----------------------|--------------------------------|---------------------------|----------------------|-------------------------|-------------------------------------------------|-------------------------------------------------------------|
|                      | Trace Metal<br>Analysis (%)    | Carbon<br>Content<br>(%)* | Stoichiometry<br>XPS | Stoichiometry<br>ICP-MS |                                                 |                                                             |
| TiO <sub>2</sub> P25 | 99.05±5.00 Ti                  | 0.195±0.127               | TiO <sub>1.97</sub>  | TiO <sub>1.87</sub>     | < LOD                                           | No growth                                                   |

ENM, engineered nanomaterial; LOD, limit of detection; \*Elemental plus organic carbon content (w/w); <sup>ε</sup>Suspension tested at 10 μg/ml, endotoxins in PBS is 76 EU/ml; <sup>†</sup>suspension tested at 50μg/ml;
